# Supplementary material
Source: PubMed Central journal article supplement (PMC3232613)

## 1 Supplemental Methods

### 2 *Kisspeptin-10 and -54 peptides:*

3 Kisspeptin-54 peptide was prepared as previously described (24-27). Human sequence kisspeptin-10  
4 was synthesised by Bachem Holding AG (Bubendorf, Switzerland), and purified by reverse-phase  
5 high performance liquid chromatography (HPLC). Electrospray mass spectroscopy and amino acid  
6 analysis confirmed identity of the peptide (lot number 3004009). The Limulus amoebocyte lysate test  
7 detected no endotoxin (Associates of Cape Cod, Liverpool, UK), and bacterial culture was sterile  
8 (Department of Microbiology, Hammersmith Hospital, London, UK), in samples of kisspeptin-10  
9 peptide. Bioactivity of kisspeptin-10 and -54 peptides was confirmed by stimulation of LH release in  
10 female mice (Supplementary Figure 1). Vials of freeze-dried kisspeptin-10 and -54 were stored at -  
11 20°C and reconstituted in 0.9% saline.

12

### 13 *Collection, processing and analysis of blood samples*

14 LH, FSH, E2 and total testosterone were measured using automated chemiluminescent immunoassays  
15 (Abbott Laboratories, Abbott Park, IL). Reference ranges for males were as follows: LH, 4–14 U/l;  
16 FSH, 1.5–8 U/l; testosterone, 10–28 nmol/l. Reference ranges for females were as follows: LH in iU/l  
17 , (2–10) follicular), 20–60 (midcycle), 4–14 (luteal); FSH in iU/l, 1.5–8 (follicular and luteal), 10-50  
18 (mid-cycle); E2 in pmol/l, <300 (early follicular), 400-1500 (midcycle), 200-1000 (luteal). The  
19 respective intraassay and interassay coefficients of variation for each assay were: 4.1 and 2.7% (LH);  
20 4.1 and 3.0% (FSH); 3.3 and 3.0% (E2); 4.2 and 2.8% (total testosterone). Analytical sensitivities  
21 were: 0.5iU/L (LH), 0.05iU/L (FSH); 37pmol/L (E2); 2nmol/L (total testosterone).

22 Plasma kisspeptin immunoreactivity (IR) was measured using an established radioimmunoassay (22-  
23 24). The antibody cross-reacted 100% with human kisspeptin-54, kisspeptin-14, and kisspeptin-10  
24 and less than 0.01% with other related RF amide proteins, including prolactin-releasing peptide, RF  
25 amide-related peptide 1 (RFRP1), RFRP2, RFRP3, QRFP43, neuropeptide FF, and neuropeptide AF.  
26 The limit of detectability was 2pmol/l, and the intra- and interassay coefficients of variation were 8.3  
27 and 10.2%, respectively. Serum and plasma samples were stored at -20°C until analysis.

**Supplemental Table 1: Inclusion criteria for healthy male and female volunteers recruited to study.**

---

**Inclusion Criteria**

---

*Male and female subjects*

age 18 to 40 years

no clinical or biochemical evidence of hypogonadism

normal thyroid function

normal serum prolactin

no therapeutic or recreational drug use

no systemic disease co-morbidity

---

*Female subjects*

regular menstrual cycles

no oral contraceptive pill therapy within the last year

no clinical or biochemical evidence of polycystic ovarian syndrome

---

1 **Supplemental Figure 1. Plasma LH following intraperitoneal injection of kisspeptin-10**  
2 **and kisspeptin-54 to female mice.**

3 In order to confirm bioactivity of kisspeptin-10, female C57BL/6 mice (weight 20-25g) were  
4 administered an intraperitoneal injection of saline, kisspeptin-10 (1 or 30nmol), or kisspeptin-  
5 54 (1 or 30nmol) (n=8 per group). Since kisspeptin-10 stimulates LH release throughout the  
6 estrous cycle (ROA 2008), animals were injected in different phases of the estrous cycle.  
7 Mice were killed after 20 minutes and blood was sampled for plasma LH, as previously  
8 described (25). Kisspeptin-54 was synthesised, purified and tested as previously described  
9 (22). Data is shown as mean +/- SEM. # P<0.001 vs. Saline; & P<0.01 vs. 1nmol kisspeptin-  
10 10. Intraperitoneal (ip) injection of 1nmol kisspeptin-10 resulted in a plasma LH level non-  
11 significantly higher than plasma LH following saline injection (mean plasma LH 20 minutes  
12 following ip injection: saline,  $0.57 \pm 0.70$ ng/ml; 1nmol kisspeptin-10,  $1.82 \pm 0.31$  ng/ml,  
13  $P>0.05$  vs. saline). However 30nmol kisspeptin-10 significantly increased plasma LH  
14 compared with saline (mean plasma LH 20 minutes following ip injection: saline,  $0.57 \pm 0.70$   
15 ng/ml; 30nmol kisspeptin-10,  $6.01 \pm 0.74$  ng/ml,  $P<0.001$  vs. saline). Intraperitoneal injection  
16 of 1 or 30nmol/kg kisspeptin-54 significantly increased plasma LH compared with saline, to a  
17 level similar to plasma LH following injection of 30nmol kisspeptin-10 (mean plasma LH 20  
18 minutes following ip injection: 30nmol kisspeptin-10  $6.01 \pm 0.74$  ng/ml; 1nmol kisspeptin-54  
19  $5.93 \pm 1.18$  ng/ml,  $P > 0.05$  vs. 30nmol kisspeptin-10; 30nmol kisspeptin-54  $6.28 \pm 0.88$   
20 ng/ml,  $P > 0.05$  vs. 30nmol kisspeptin-10).

# Supplemental Figure 1

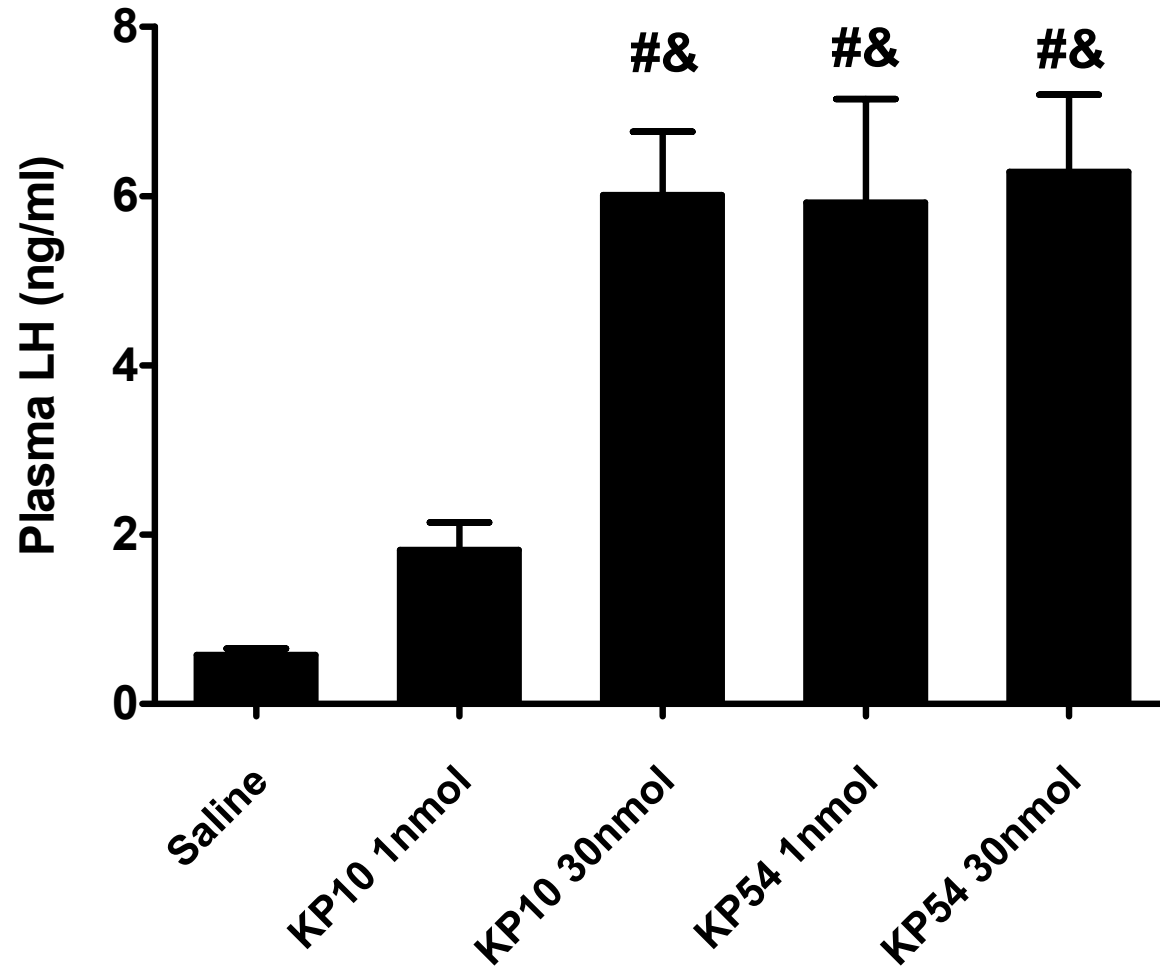

Supplement: supp_jc.2011-1408_11-1408_Suppl_Data.pdf [file supp_jc.2011-1408_11-1408_Suppl_Data.pdf]
